# Supplementary material
Source: PubMed Central journal article supplement (PMC4127635)
Supplement: NIHMS607615-supplement-1.pdf [file NIHMS607615-supplement-1.pdf]

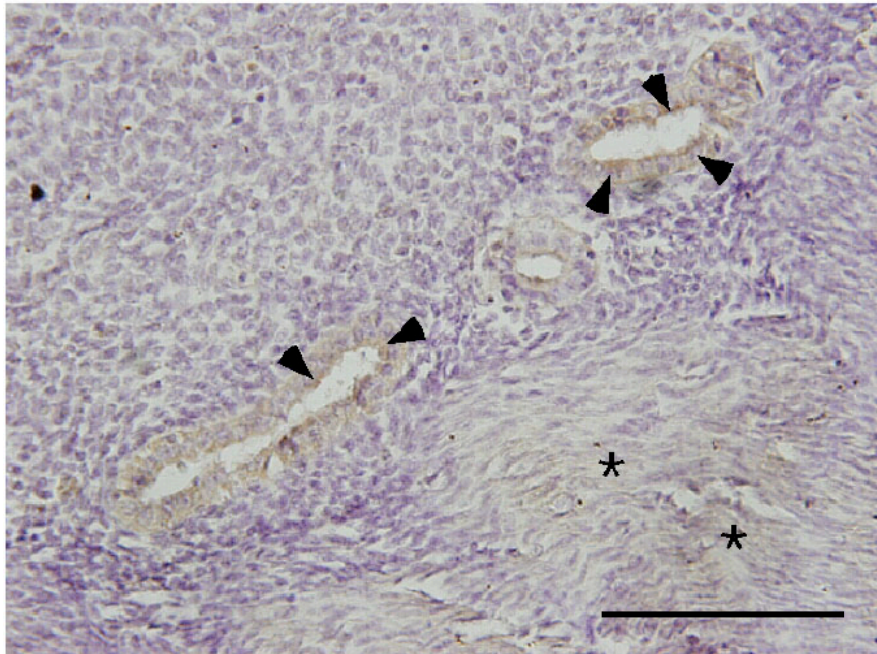

**Supplemental Fig. 1.** Phage overlay on frozen sections of human uterine endometriosis. Phage pools obtained after three rounds of screening were overlayed on frozen sections. Binding of phage to tissue was visualized by the immunoperoxidase method using rabbit anti-T7 phage antibody. Hematoxylin served as counterstain. Arrowheads show positive staining at apical membranes of endometrial glandular epithelia. Asterisks show weak staining of smooth muscle of the myometrium. Scale bar, 200  $\mu\text{m}$ .

Restore Original
Trans-Proteomic Pipeline pepXML Viewer  
A.Keller 2.23.05
Write Displayed Data Subset to File  
file name: .shhtml

---

Filter / Sort / Discard checked entries
[More Analysis Info](#) [Help](#)

sort by:  index  spectrum  peptide  protein  SEQUEST xcorr  
 PeptideProphet™ probability

min probability: 0.8    min num tol term:    exclude charge:  1+  2+  3+  others

SEQUEST results: min xcorr:    min deltacn:    max sprank:

proteins:  ref all  show all    search scores:  show  hide    Pep3D menu:  show  hide

include aa:    mark aa:    NXS/T:     spectrum text:    export to excel:

full menu     show discarded entries     clear manual discards/restores

3 entries retrieved from /home/sorcerer/output/2006-04-07\_09h16m10s/interact.xml

---

| index                       | prob   | spectrum                            | xcorr | deltacn | sprank | m ions                 | peptide         | protein                                                                                       |
|-----------------------------|--------|-------------------------------------|-------|---------|--------|------------------------|-----------------|-----------------------------------------------------------------------------------------------|
| <input type="checkbox"/> 3  | 0.9995 | <a href="#">sample539.27.27.2</a>   | 1.494 | 0.200   | 4      | <a href="#">7/ 16</a>  | R.SETDTSSEK.D   | <a href="#">IPI:IPI00477539.1 ENSEMBL:ENSP000003!</a>                                         |
| <input type="checkbox"/> 19 | 0.9999 | <a href="#">sample539.78.78.2</a>   | 4.501 | 0.163   | 4      | <a href="#">7/ 12</a>  | R.QRTALVK.K     | <a href="#">IPI:IPI00178093.3 SWISS-PROT:Q9NCW3-1 REFSEQ_NF:NP_061971 ENSEMBL:ENSP000003!</a> |
| <input type="checkbox"/> 51 | 1.0000 | <a href="#">sample539.960.960.3</a> | 1.752 | 0.171   | 3      | <a href="#">15/ 40</a> | R.IFGEDFIATFK.R | <a href="#">IPI:IPI00307820.3 SWISS-PROT:Q96MM6 REFSEQ_NF:NP_443202 ENSEMBL:ENSP000003!</a>   |

**Supplemental Fig. 2. Trans-Proteomic Pipeline pepXML view of top 3 proteins identified by SEQUEST Sorcerer 2 search engines.** Three proteins were identified by proteomics analysis as potential receptors for z13 peptide. They included heat shock protein (70 kDa), CNGB3 (68 kDa), and NRDE2 homolog (133 kDa). We assumed that the receptor was a plasma membrane protein; thus we excluded both heat shock protein, which is cytoplasmic, and NRDE2, which is a nuclear protein, as candidates.

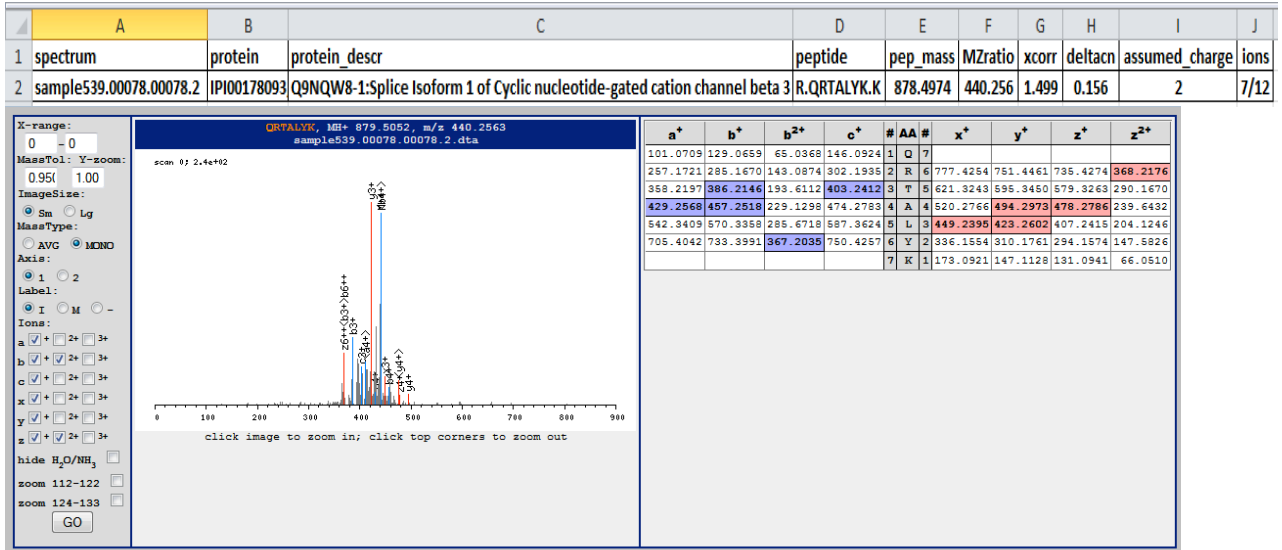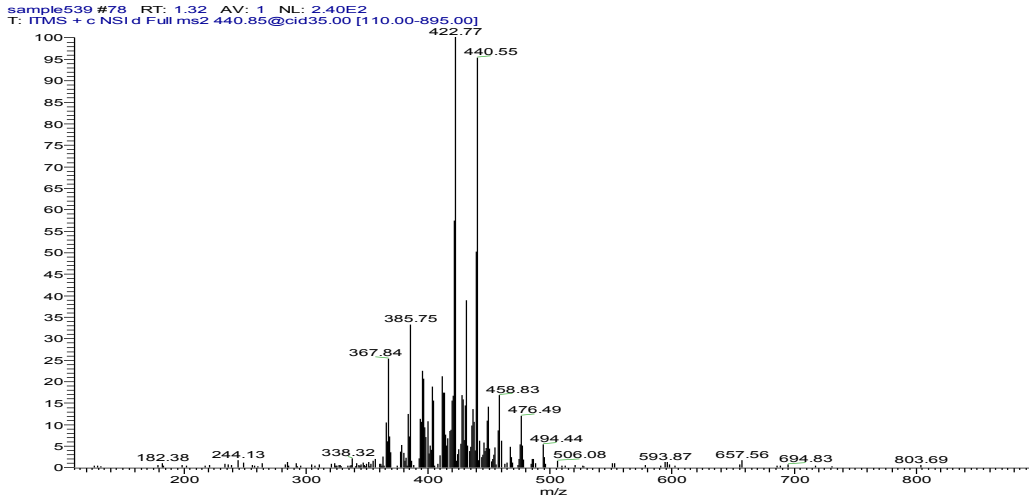

**Supplemental Fig. 3.** The MS2 spectra for the identified CNGB3 peptide. The MS2 spectra (upper panel) and distribution of the fragmentation ions for the identified peptide uniquely derived from CNGB3 (lower panel) are shown.

Human CNGB3 (809 aa)

MFKSLTKVNKVKPIGENNENEQSSRRNEEGSHPSNQSQOTTAQEENKGEESLTKTKSTP  
VTSEEPHTNIQDKLSKKNSSGDLTTNPDQNAAEPTGTVPEQKEMDPGKEGPNSPQNKP  
PAAPVINEYADAQLHNLVKRMR**QRTALYK**KKLVEGDLSSPEASPQTAKPTAVPPVKESD  
DKPTEHYRLLWFVKVKMPLTEYLKRIKLPNSIDSYTDRLYLLWLLLVTLAYNWCWFI  
PLRLVFPYQTADNIHYWLIADIICDIIYLYDMLFIQPRLQFVRGGDIIVDSNELRKHYR  
TSTKFQLDVASIIPFDICYLFFGFNPMFRANRMLKYTSFFEFNHHLESIMDKAYIYRVI  
RTTGYYLLFILHINACVYYWASNYEGIGTTRWVYDGEGNEYLRCCYYWAVRTLITIGGLPE  
PQTLFEIVFQLLNFSGVVFVSSLIQMRDVI GAATANQNYFRACMDDTIAYMNNYSIP  
KLVQKRVRTWYEYTWDSQRMLEDSDLLKTLPTTVQLALAI DVNFSII SKVDLFGKCDTQ  
MIYDMLLRKSVLYLPGDFVCKKGEIGKEMYIIKHGEVQVLGGPDGTVLVTLKAGSVF  
GEISLLAAGGNRRRTANVVAHG FANLLTLDKKTLQEILVHYPDSERILMKKARVLLKQK  
AKTAEATPPRKDLALLFPPKEETPKLFTLLGGTGKASLARLLKLRQAAQKENSEG  
GEEGKENEKQKENEKQ**KENEDKGKENEKDKGREPEEKPL**DRPECTASPIAVEEEP  
HSVRRTVLPRTSRQSLIISMAPSAEGGEEVLTIEVKEKAKQ

**Tryptic peptide sequence** identified by proteomics.

**3B2 epitope:** a cytoplasmic domain peptide sequence used for raising mouse monoclonal antibody.

**Supplemental Fig. 4.** Peptide sequence identified by proteomics and 3B2 epitope for mouse CNGB3 monoclonal antibody.

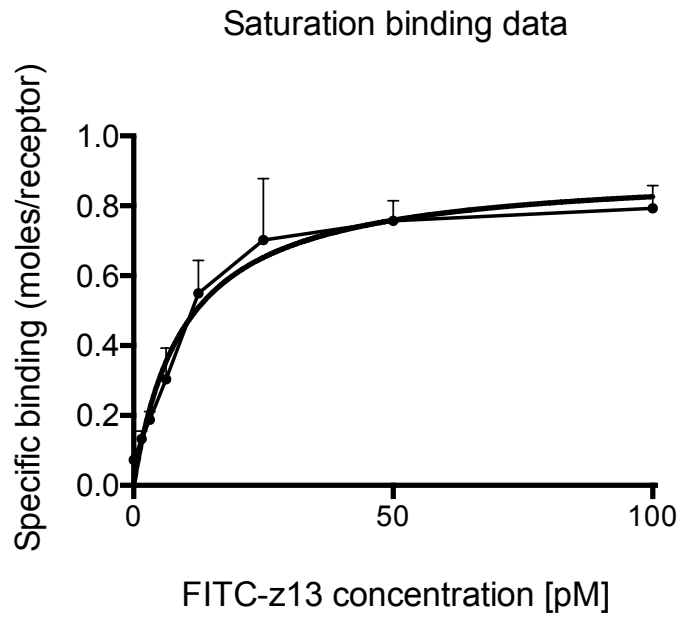

|      | Specific binding (moles/receptor) |
|------|-----------------------------------|
| Bmax | 0.9068                            |
| Kd   | 9.759                             |

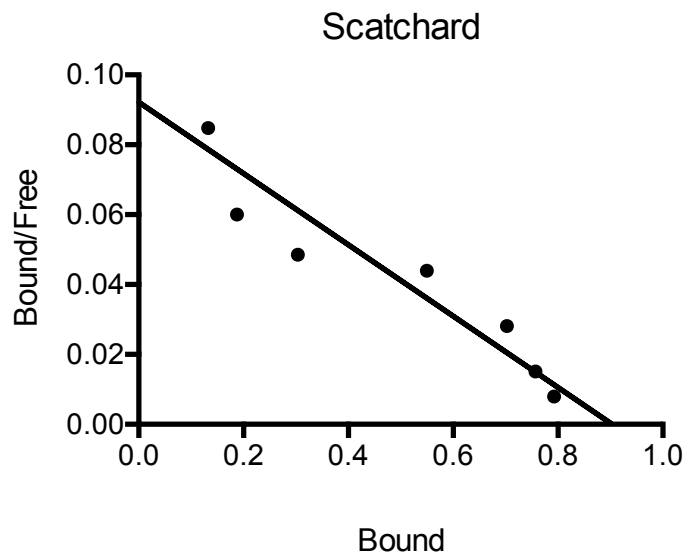

**Supplemental Fig. 5.** Kinetic analysis of FITC-z13 binding to HEK293T cells transfected for CNGB3-Myc.

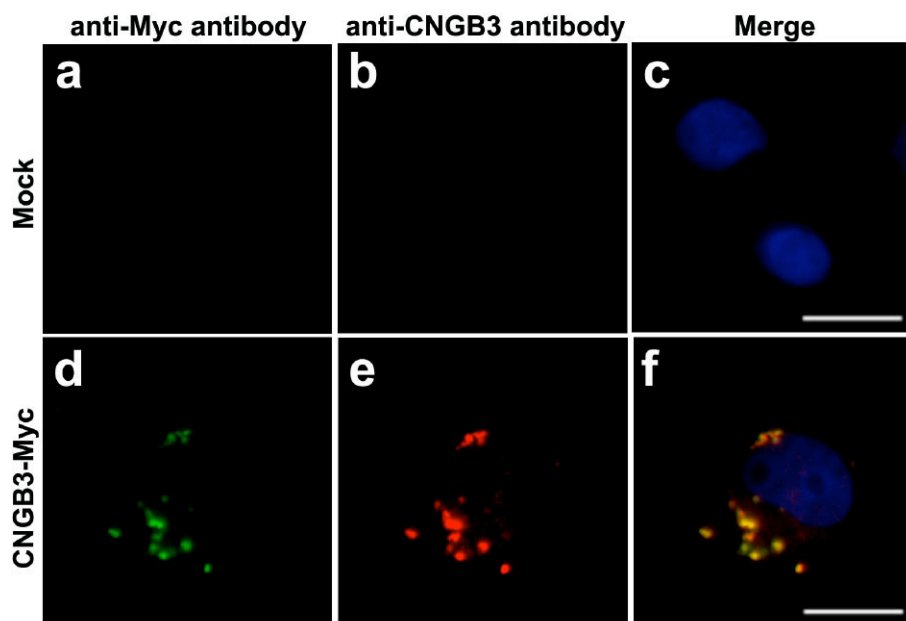

**Supplemental Fig. 6.** Immunostaining of transfected HeLa cells by anti-Myc antibody and anti-CNGB3 antibody. HeLa cells were transfected by either pCMV-Myc vector (mock) or with vector harboring CNGB3-Myc cDNA. Cells were subjected to double-immunofluorescence microscopy by rabbit anti-Myc antibody and mouse anti-CNGB3 antibody (3B2) followed by Alexa 488-conjugated anti-rabbit IgG antibody (green) and Alexa 594-conjugated anti-mouse IgG antibody (red). Nuclear staining were with DAPI (blue). Scale bar 50  $\mu$ m.

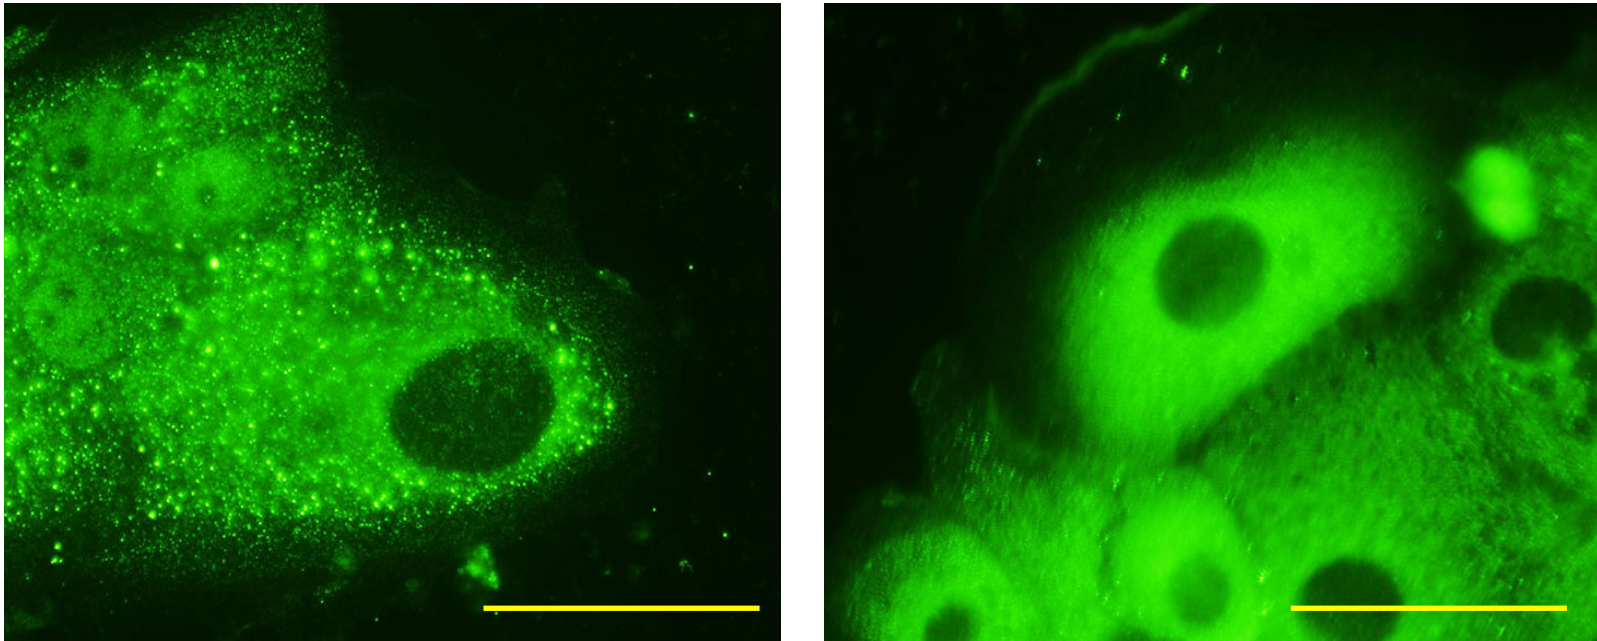

**Supplemental Fig. 7.** Localization of the known lysosomal marker protein ACP1 (acid phosphatase 1) in CNGB3 expressing A431 cells in the presence (right) or absence of HLA-z13, as an indicator of endosome-escaping activity. Cells on the right were treated with HLA-z13 (50  $\mu\text{g}/\text{ml}$ ) at 37  $^{\circ}\text{C}$  for 1 hour. Scale bars: 50  $\mu\text{m}$ .

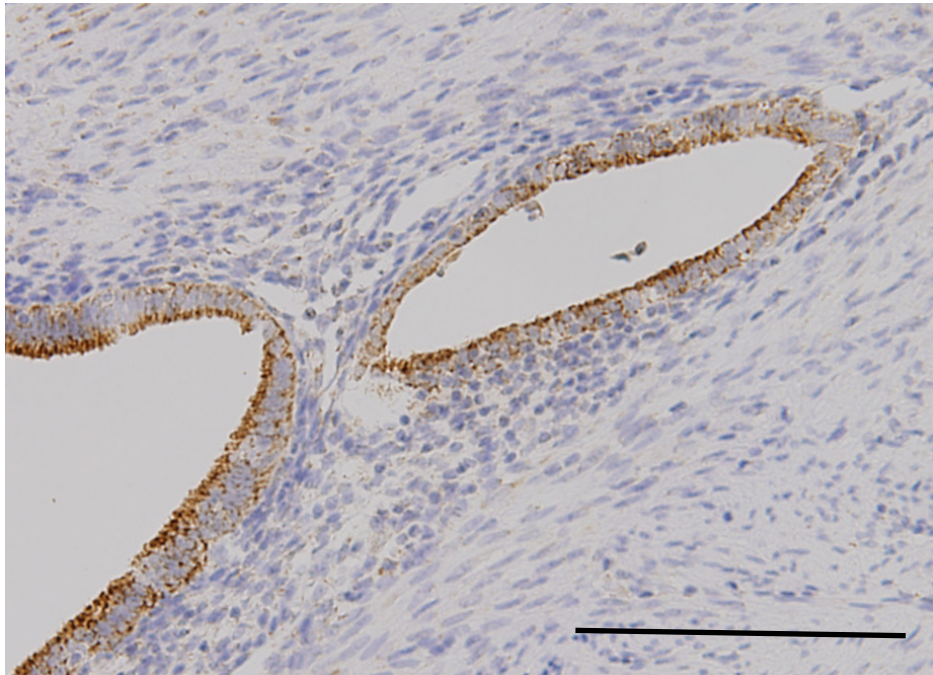

**Supplemental Fig. 8.** Immunohistochemistry of baboon endometriosis tissue stained by anti-CNGB3 antibody. Scale bar 100  $\mu\text{m}$



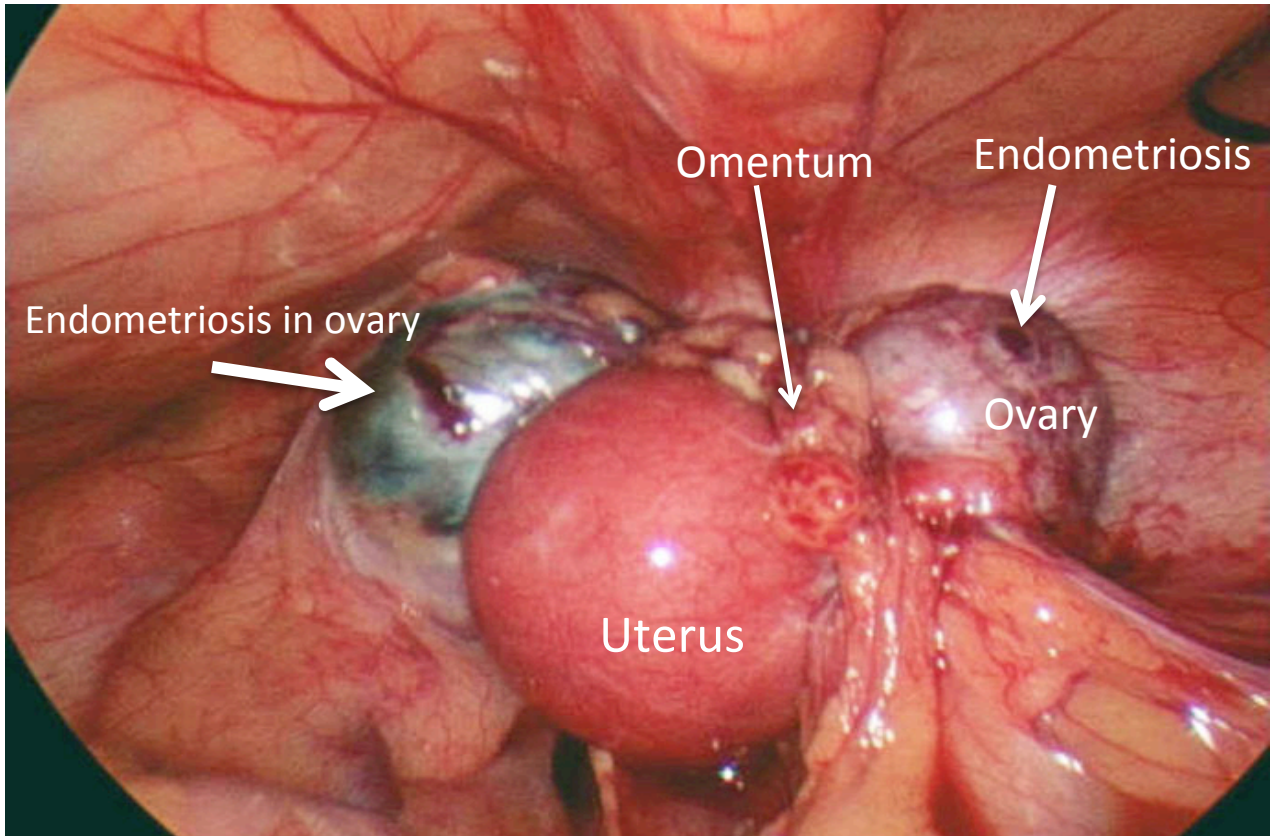

**Supplemental Fig. 9.** Peritoneal endometriosis in a baboon visualized by laparoscopy.

| entry no. | protein     | description                                   | peptide sequence | Xcorr | deltacn | sprank | ions   | protein probability |
|-----------|-------------|-----------------------------------------------|------------------|-------|---------|--------|--------|---------------------|
| 1         | IPI00307820 | Heat shock 70 kDa protein 12B.                | IFGEDFIATFKR     | 1.752 | 0.171   | 3      | 15/ 40 | 1                   |
| 2         | IPI00178093 | cyclic nucleotide-gated cation channel beta-3 | QRTALYKK         | 1.501 | 0.163   | 1      | 7/ 12  | 0.9999              |
| 3         | IPI00477539 | Protein NRDE2 homolog                         | SETDTDSEK        | 1.494 | 0.2     | 4      | 7/16   | 0.9995              |

**Supplemental Table 1. Identification of proteins by LC-MSMS analysis.** Only one peptide sequence for each protein was available due to the small amount of protein isolated by peptide affinity chromatography. We validated that CNGB3 is the z13 receptor by biochemical assays shown in Figs. 2 and 3.
